# Supplementary material for: Inhibitory Effects of a Novel PPAR-γAgonist MEKT1 onPomcExpression/ACTH Secretion in AtT20 Cells
Source: Hindawi journal article supplement (doi:10.1155/2018/5346272), 2018-01-01
Supplement: f1 [file 5346272.f1.pdf]

## Inhibitory effects of a novel PPAR- $\gamma$ agonist MEKT1 on *Pomc* expression/ACTH secretion in AtT20 cells

### Figure Legends of Supplementary

Figure S1

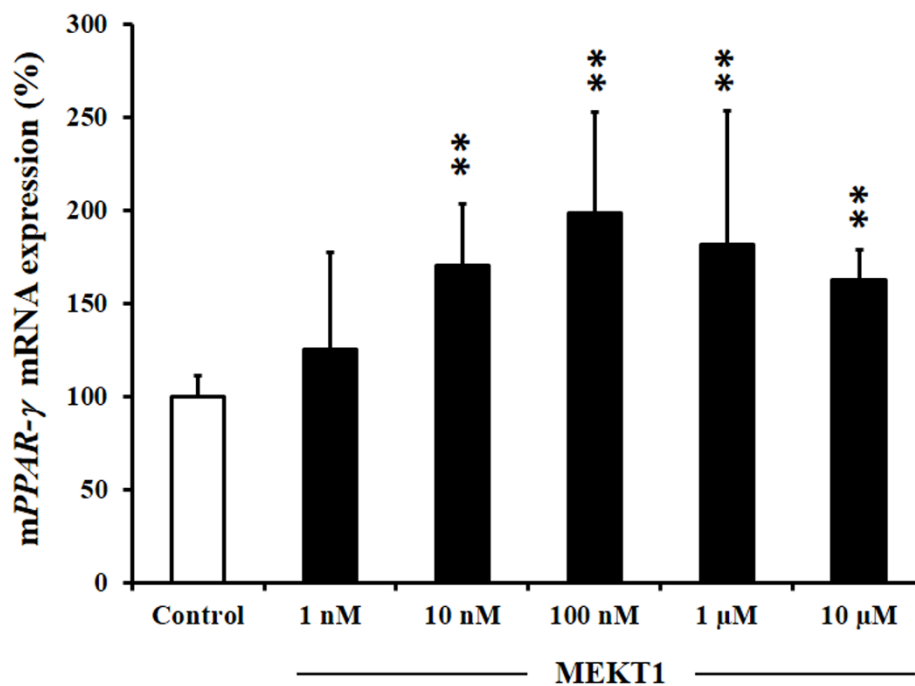

**Figure S1. MEKT1-mediated effect of *PPAR- $\gamma$*  mRNA expression in AtT20 cells in a dose-dependent manner.** AtT20 cells were treated with MEKT1 (1 nM, 10 nM, 100 nM, 1  $\mu$ M, or 10  $\mu$ M) or 0.1% DMSO (vehicle control) for 24 hours. Data are expressed as percentages (100%) of control. Data represent mean  $\pm$  SEM (n=4). \*\*P<0.01 vs control.

**Figure S2**

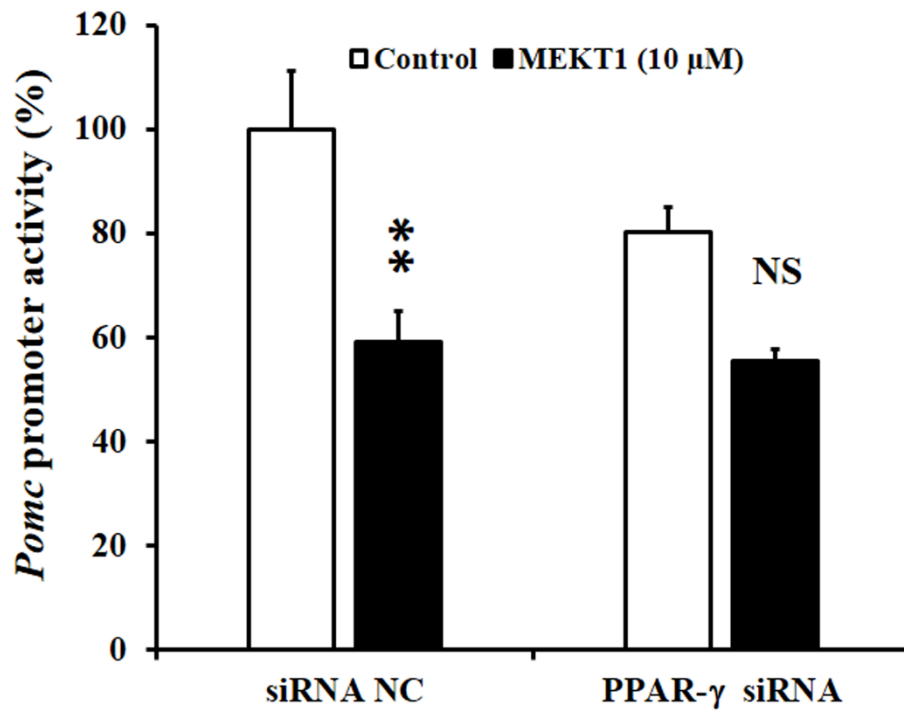

**Figure S2. Involvement of PPAR- $\gamma$  in the MEKT1 effects on *Pomc* promoter activity.**

AtT20 cells transiently transfected with rPomc-luc, pRSV- $\beta$ -gal, and siRNA (negative control; NC or PPAR- $\gamma$ ) for 48 hours were incubated in the presence of either MEKT1 (10  $\mu$ M) or 0.1% DMSO (control) for 24 hours, respectively. Results are expressed as percentages (100 %) of control. Each point represents mean  $\pm$  SEM (n = 4). NS stands for “not significant.” \*\*P<0.01 vs negative control of siRNA at 10  $\mu$ M MEKT1.

**Figure S3**

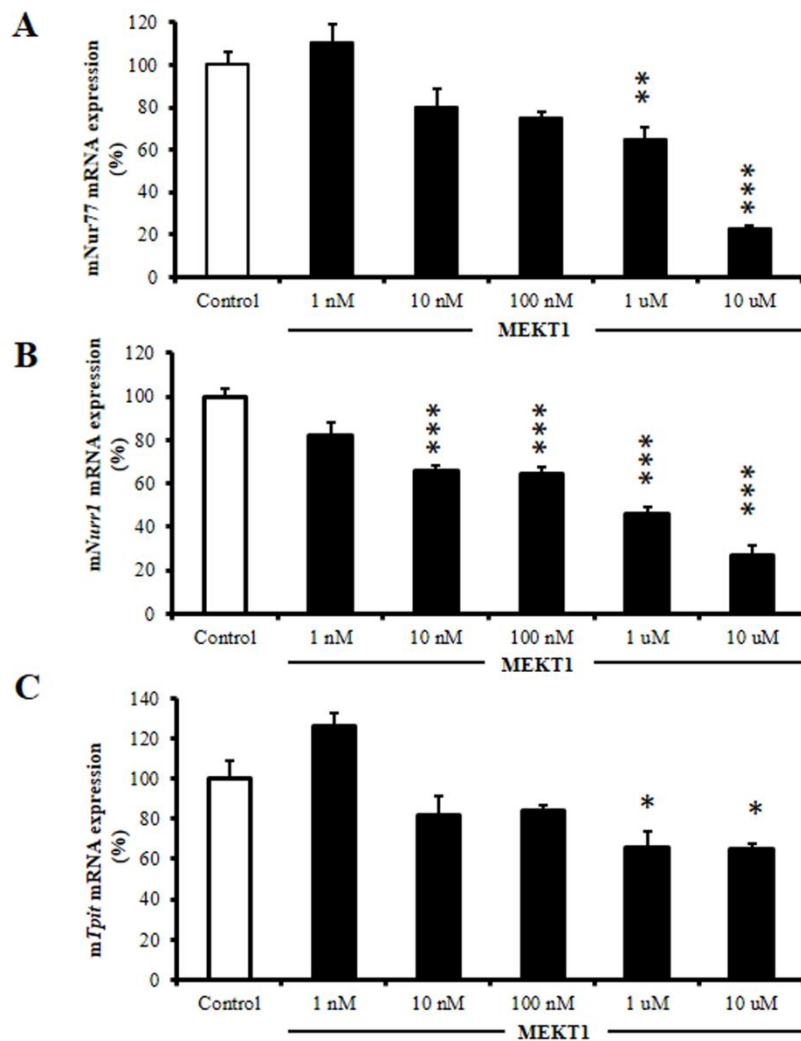

**Figure S3. MEKT1-mediated effects on the mRNA expression of Nur77, *Nurr1*, and *Tpit* in AtT20 cells are dose-dependent.**

(A) Dose-dependent effect of MEKT1 of *Nur77* mRNA expression. AtT20 cells were treated with MEKT1 (1 nM, 10 nM, 100 nM, 1 μM, or 10 μM) or 0.1% DMSO (vehicle control) for 24 hours. (B) Dose-dependent effect of MEKT1 on *Nurr1* mRNA expression. AtT20 cells were treated with MEKT1 (1 nM, 10 nM, 100 nM, 1 μM, or 10 μM) or 0.1% DMSO (vehicle control) for 24 hours. (C) Dose-dependent effect of MEKT1 on *Tpit* mRNA expression. AtT20 cells were treated with MEKT1 (1 nM, 10 nM, 100 nM, 1 μM, or 10 μM) or 0.1% DMSO (vehicle control) for 24 hours. Each point represents mean ± SEM (n=4). Data are presented as percentages of control (100%). \*P<0.05, \*\*P<0.01, \*\*\*P<0.001 vs control.

**Figure S4**

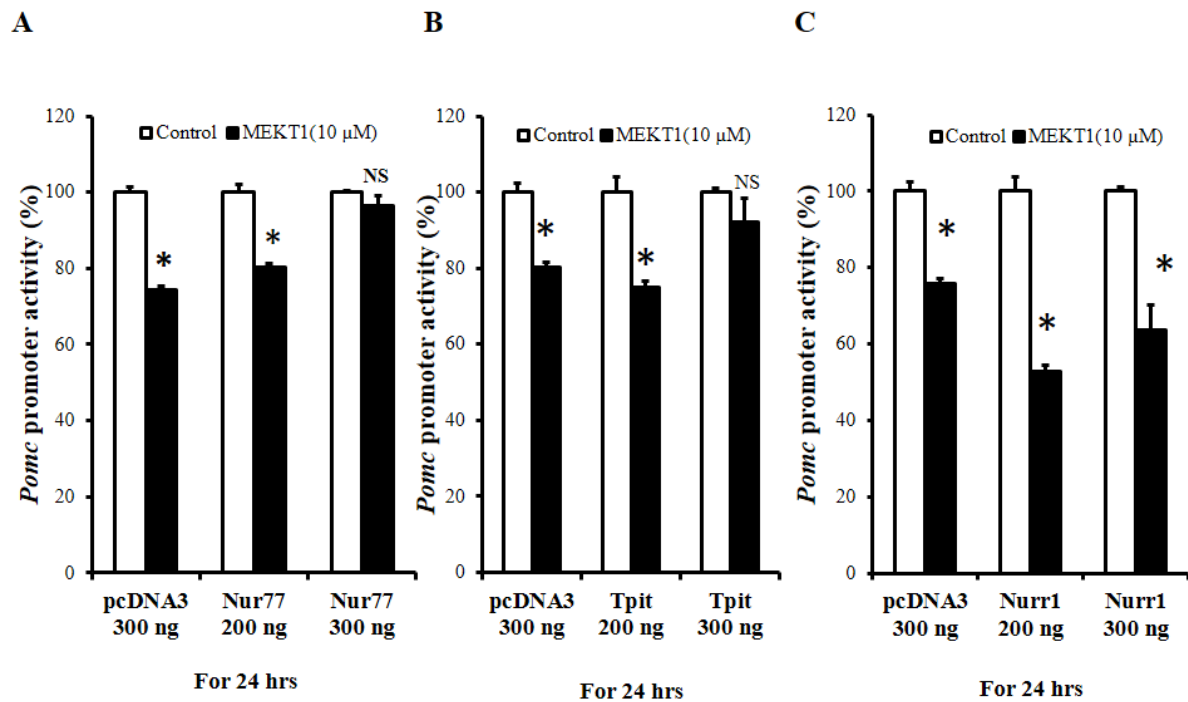

**Figure S4. Effects of Nur77, Tpit, and Nurr1 overexpression on MEKT1-mediated effect of promoter activity of *Pomc*.** AtT20 cells were transiently transfected with pcDNA3 and Nur77 overexpression plasmid in (A), Tpit overexpression plasmid in (B), and Nurr1 overexpression plasmid in (C) and 135 ng of rPomc-Luc, and 65 ng of pRSV- $\beta$ -gal were incubated either in the presence of MEKT1 at 10  $\mu$ M or DMSO at 0.1 % (control) for 24 hours before the luciferase assay. Each overexpression plasmid volume was maintained to 300 ng adding pcDNA3 empty vector. Results are expressed as percentages of each control (100%). Data represent mean  $\pm$  SEM (n=4). NS means “not significant.” \*P<0.05 vs control.
